# Supplementary material for: Cd(II)-sulfonyldibenzoilate coordination polymers based on mono-, bi-, tri- and tetranuclear cores as nodes
Source: Royal Society of Chemistry journal article supplement (doi:10.1039/b718659b), 2008-01-01
Supplement: b718659b.pdf [file b718659b.pdf]

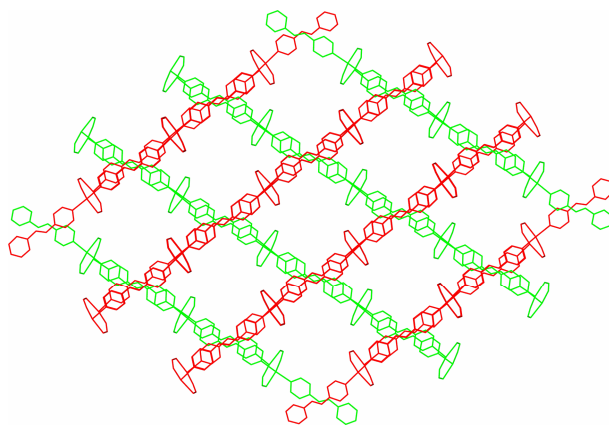

Figure S1. The  $\pi$ - $\pi$  stacking make the traps intercross each other in the form of (4, 4) lattice along the  $c$  direction in compound **2**.

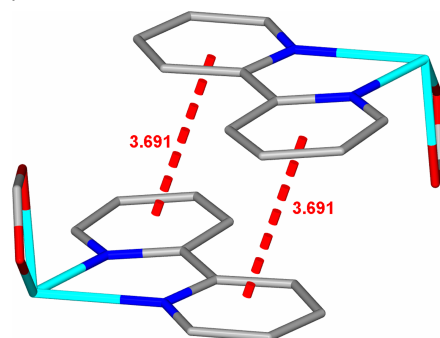

Figure S2. The  $\pi$ - $\pi$  stacking between the 2, 2'-bipy molecule in compound **4**.

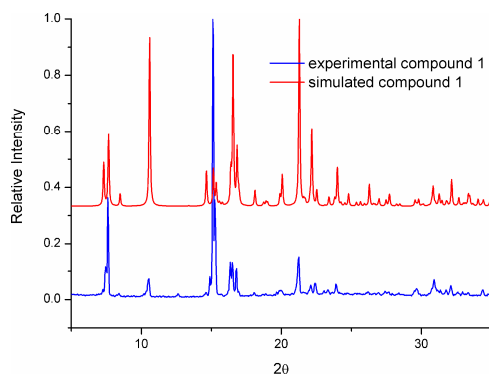

(1)

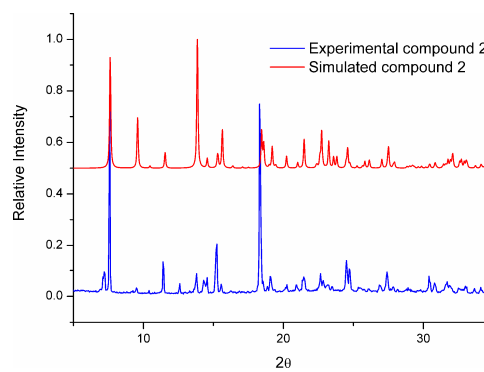

(2)

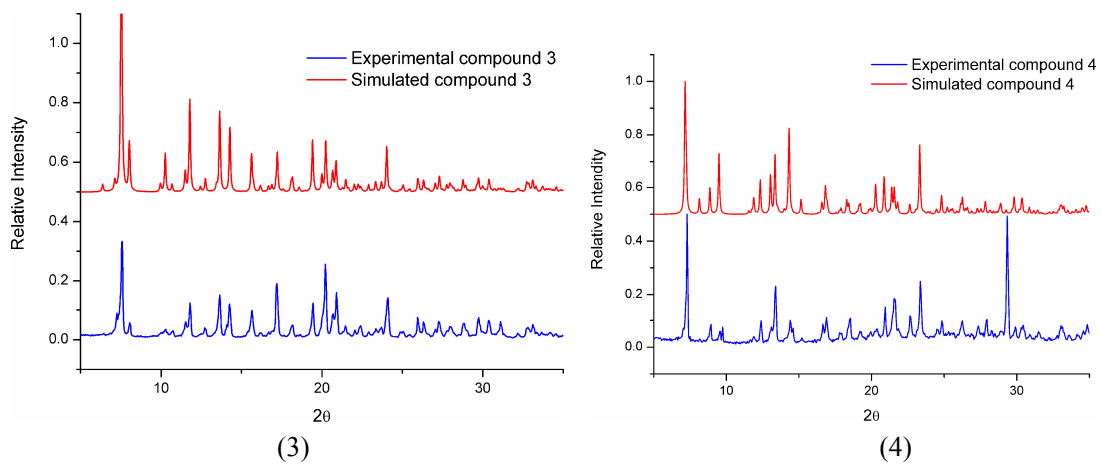

Figure S3. X-ray powder diffraction (XPD) patterns of compounds **1-4**.
